# Supplementary material for: Preliminary Validation of the Exercise-Snacking Licensing Scale: Rewarding Exercise with Unhealthy Snack Foods and Drinks
Source: MDPI journal article supplement (doi:10.3390/nu10121866), 2018-12-02
Supplement: s1 [file s1]

**Supplementary Table S1.** Composite-level descriptive statistics and alpha coefficients within exercise correlates in the light ( $n = 199$ ) and tiring ( $n = 297$ ) physical activity conditions

| Variable                                      | Intensity       | Mean  | SD    | Skew / Kurt   | $\alpha$ |
|-----------------------------------------------|-----------------|-------|-------|---------------|----------|
| 1. Motivation for exercise                    | L               | 8.85  | 6.50  | - .42 / - .62 | ---      |
|                                               | T               | 6.70  | 7.34  | - .35 / - .48 | ---      |
| 2. Exercising for enjoyment                   | L               | 3.39  | 1.31  | - .67 / - .29 | 0.92     |
|                                               | T               | 3.20  | 1.48  | - .65 / - .67 | 0.93     |
| 3. Exercising for revitalisation              | L               | 3.42  | 1.27  | - .74 / .03   | 0.89     |
|                                               | T               | 3.27  | 1.45  | - .81 / - .27 | 0.91     |
| 4. Exercising to avoid ill-health             | L               | 3.36  | 1.43  | - .73 / - .24 | 0.95     |
|                                               | T               | 3.55  | 1.33  | - .98 / .39   | 0.93     |
| 5. Exercise for positive health               | L               | 3.67  | 1.34  | - 1.13 / .66  | 0.96     |
|                                               | T               | 3.87  | 1.20  | - 1.27 / 1.51 | 0.94     |
| 6. Exercise for weight management             | L               | 2.97  | 1.51  | - .49 / - .74 | 0.91     |
|                                               | T               | 3.37  | 1.42  | - .85 / - .10 | 0.89     |
| 7. Exercising for appearance                  | L               | 2.99  | 1.49  | - .49 / - .58 | 0.92     |
|                                               | T               | 3.23  | 1.39  | - .73 / - .24 | 0.92     |
| 8. Godin-Shephard leisure time exercise score | L ( $n = 179$ ) | 51.73 | 48.61 | 3.04 / 13.85  | --       |
|                                               | T ( $n = 262$ ) | 53.01 | 42.36 | 2.11 / 6.43   | --       |

Note: Intensity denotes the intensity level of exercise where L = light physical activity and T = tiring physical activity. Motivation for exercise = measured by the relative autonomy index of the Behavioural Regulation of Exercise Questionnaire- 2, where higher scores denote greater autonomous (relative to controlled) motivation towards exercise. Exercising for: enjoyment, revitalisation, to avoid ill-health, for positive health, weight management or appearance, measured by subscales of the Exercise Motivations Inventory -2, where higher scores denote greater agreeance to exercising for stated reason

**Supplementary Table S2.** Composite-level descriptive statistics and alpha coefficients within diet-related and dispositional correlates in the light ( $n = 211$ ) and tiring ( $n = 313$ ) physical activity conditions

| Variable                                    | Intensity | Mean | SD   | Skew / Kurt | $\alpha$ |
|---------------------------------------------|-----------|------|------|-------------|----------|
| 1. Affective attitudes                      | L         | 4.94 | 1.12 | -.25 / -.21 | 0.73     |
|                                             | T         | 4.93 | 1.17 | -.60 / .45  | 0.74     |
| 2. Instrumental attitudes                   | L         | 2.26 | 1.08 | 1.18 / .88  | 0.89     |
|                                             | T         | 2.38 | 1.23 | 1.48 / 2.00 | 0.91     |
| 3. Trait self-control                       | L         | 3.06 | .72  | .22 / -.18  | 0.85     |
|                                             | T         | 3.12 | .69  | .11 / -.17  | 0.83     |
| 4. Food-related self-control                | L         | 3.62 | 1.73 | .31 / -.83  | 0.89     |
|                                             | T         | 3.57 | 1.71 | .31 / -.73  | 0.91     |
| 5. Compensatory health beliefs              | L         | 1.02 | .82  | .89 / .71   | 0.78     |
|                                             | T         | 1.02 | .79  | .92 / .64   | 0.76     |
| 6. Diet-related compensatory health beliefs | L         | 1.20 | .85  | .79 / 1.15  | 0.73     |
|                                             | T         | 1.12 | .84  | .77 / .29   | 0.78     |

Note: Intensity denotes the intensity level of exercise where L = light physical activity and T = tiring physical activity.
